# Supplementary material
Source: PubMed Central journal article supplement (PMC9087383)
Supplement: EJI-52-936-s001.pdf [file EJI-52-936-s001.pdf]

**Supporting information Figure 1**

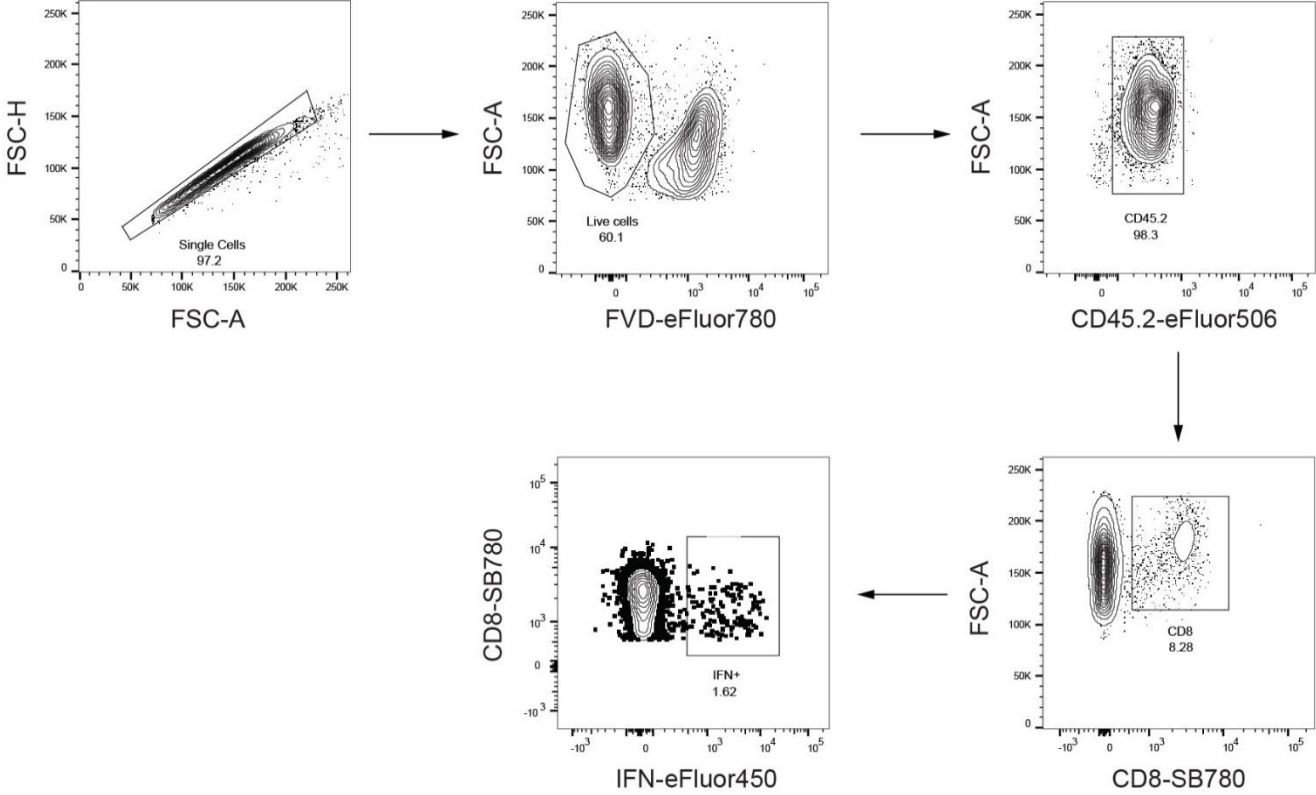

**Supporting information Figure 1 (related to Figure 2 and Figure 3). Gating strategy used to detect IFN-γ producing cells in the lungs and spleen of BALB/c mice. Depicted is the gating path in a spleen sample from ChAdOx1-S IM immunized animal.**

**Supporting information Figure 2**

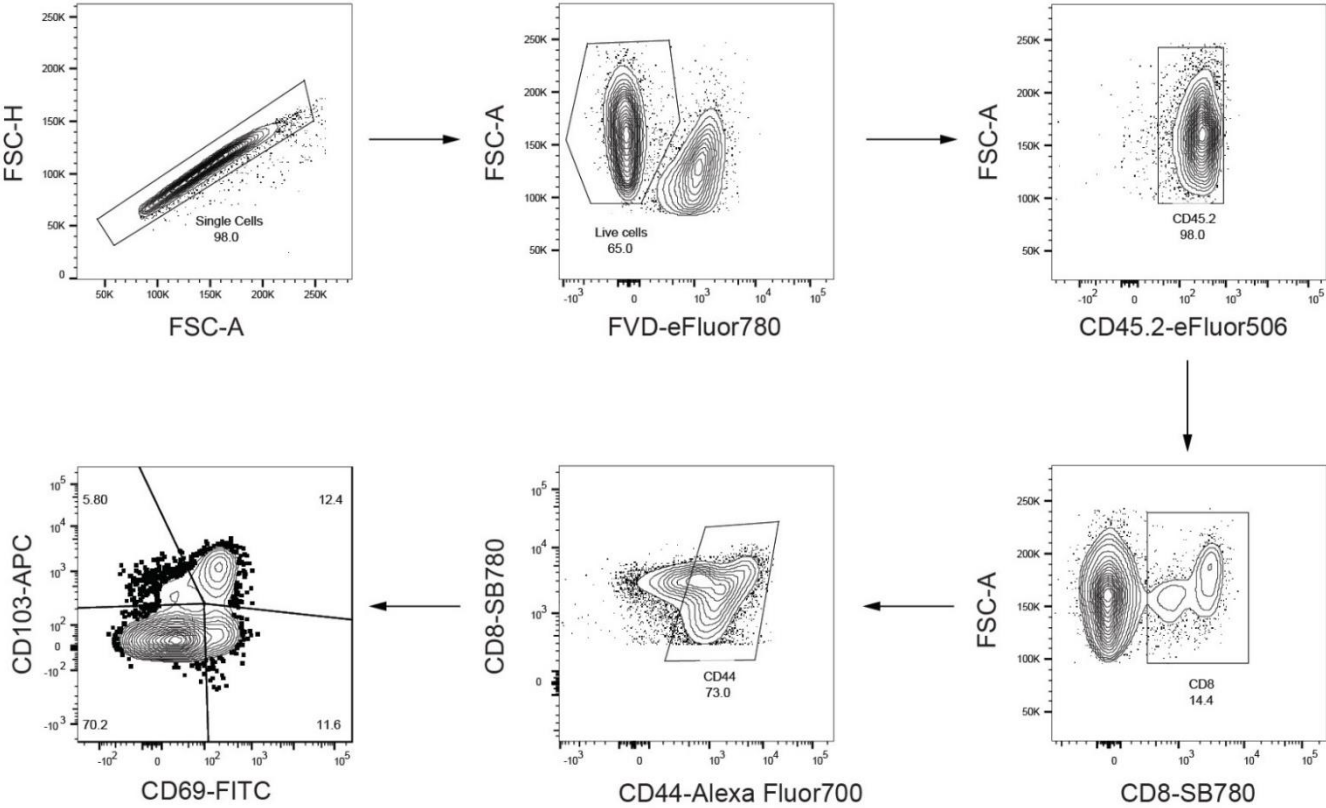

**Supporting information Figure 2 (related to Figure 2). Gating strategy used to detect tissue-resident ( $T_{RM}$ ) CD8 T cells in the lungs of BALB/c mice. Depicted is the gating path in a lung sample from ChAdOx1-S IN immunized animal.**

## Supporting information Figure 3

**A**

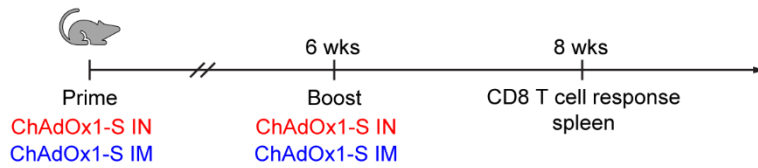

**B**

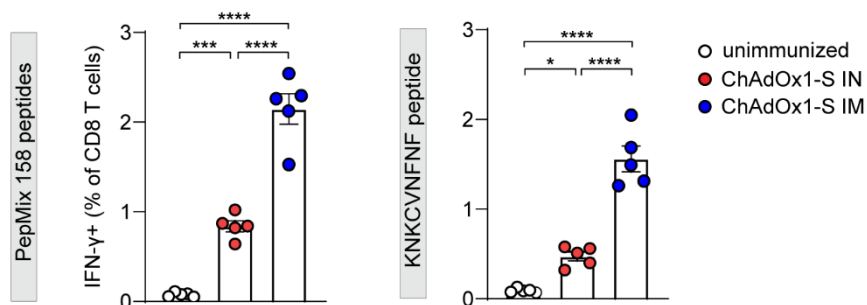

**Supporting information Figure 3 (related to Figure 2). IFN- $\gamma$  production by CD8 T cells in the spleen of BALB/c mice after peptide stimulation.** (A) BALB/c mice were vaccinated via intranasal (IN) or intramuscular (IM) route with ChAdOx1-S. (B) Eight weeks after the first immunization spleen homogenates were restimulated with Spike-specific peptide pool (left panel) and peptide KNKCVNFNF (S535-543) (right panel). The responding CD8 T cells were identified by intracellular staining for accumulated IFN- $\gamma$ . Bars represent group means overlaid with individual data points (n=5). Data were analyzed by one-way ANOVA followed by Tukey's multiple comparison test; p values indicate significant differences (\*p < 0.05, \*\*\*p < 0.001, \*\*\*\*p < 0.0001).

## Supporting information Figure 4

**A**

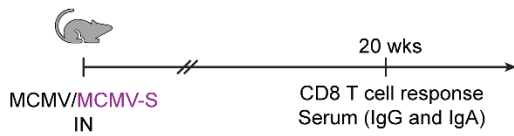

**B**

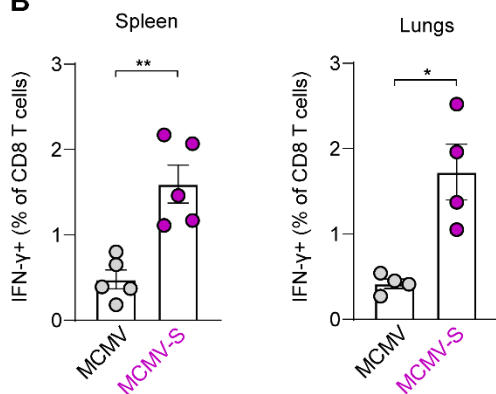

**C**

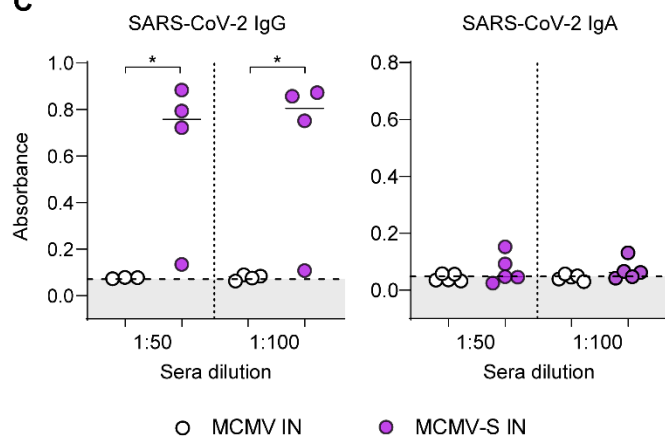

**Supporting information Figure 4 (related to Figure 3). Cellular and humoral immune response after intranasal MCMV-S infection.** (A) BALB/c mice were infected intranasally with MCMV or MCMV-S ( $2 \times 10^5$  PFU/mouse). (B) Twenty weeks after intranasal immunization spleen (left panel) and lung (right panel) homogenates were restimulated with Spike-specific peptide pool. The responding CD8 T cells were identified by intracellular staining for accumulated IFN- $\gamma$ . Bars represent group means overlaid with individual data points ( $n=5$ ). (C) Spike-specific IgG and IgA were assessed by ELISA ( $n=3-5$ ). Dotted lines indicate the median absorbance value of MCMV immunized mice sera. Data were analyzed by Mann-Whitney U test; p values indicate significant differences (\* $p < 0.05$ ; \*\* $p < 0.01$ ).

## Supporting information Figure 5

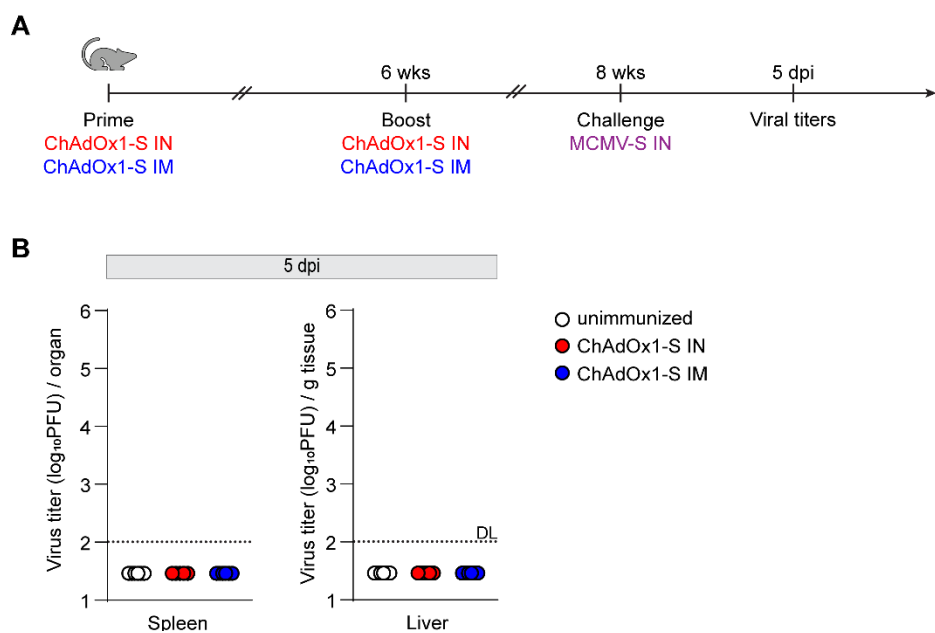

**Supporting information Figure 5 (related to Figure 3). Virus titers in the organs of BALB/c mice after intranasal MCMV-S challenge.** (A) BALB/c mice were vaccinated via intranasal (IN) or intramuscular (IM) route with ChAdOx1-S. Six weeks after the first immunization, mice were boosted and two weeks later challenged with intranasal (IN) inoculation of MCMV-S ( $2 \times 10^5$  PFU/mouse). (B) Five days after the intranasal challenge, tissues were harvested and viral titers determined in spleen and liver homogenates ( $n=4-7$ ). Titters in organs of individual mice are shown (circles). Dotted lines indicate the detection limit of the assay (DL).

## Supporting information Figure 6

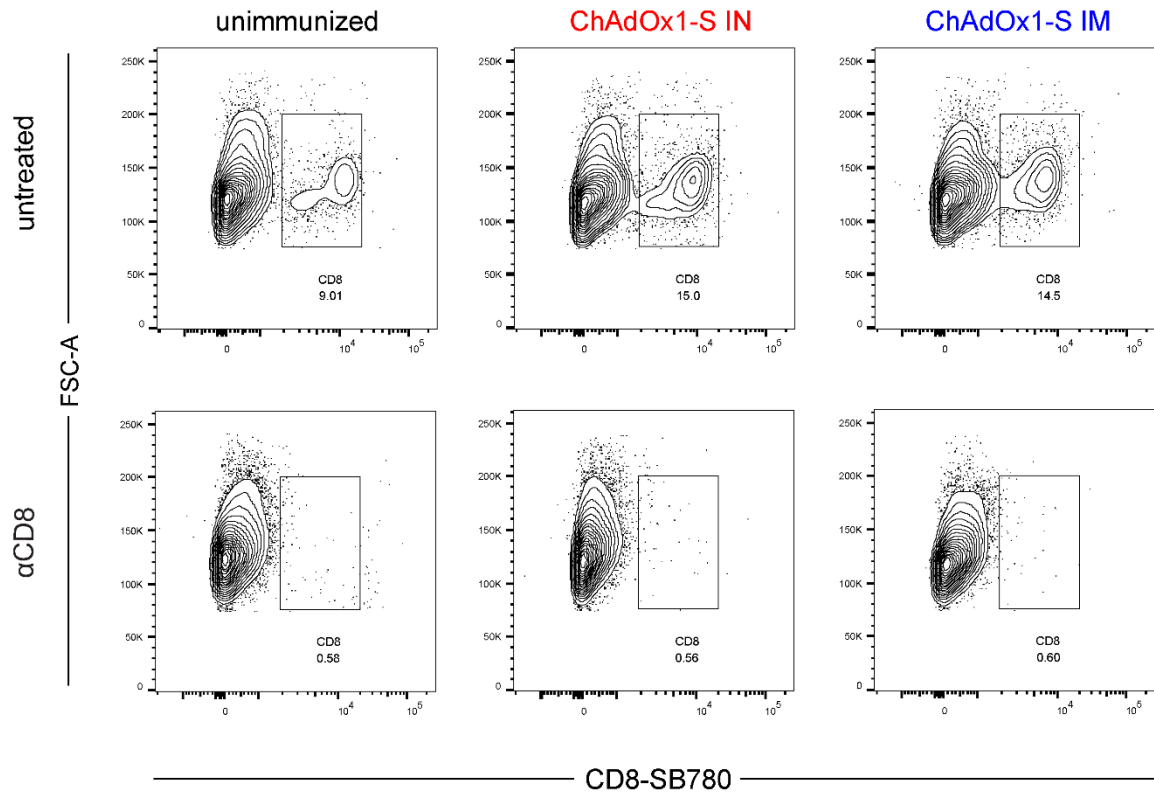

**Supporting information Figure 6 (related to Figure 3). Efficacy of in vivo CD8 T cell depletion in BALB/c mice.** CD8 T cells were depleted systemically by intraperitoneal injection of 500  $\mu$ g of  $\alpha$ -CD8 $\alpha$  antibody one day before intranasal MCMV-S challenge. Leukocytes from spleen and lungs were analyzed by flow cytometry on day 5 post-depletion. Representative flow cytometry panels of CD8 T cells in the lungs are shown.
